# Supplementary material for: 4,4′-Diaminodiphenyl Sulfone (DDS) as an Inflammasome Competitor
Source: MDPI journal article supplement (doi:10.3390/ijms21175953), 2020-08-19
Supplement: s1 [file s1]

Issue Number: 20206241314495\_30314819

For Submission

# Volunteer Certificate

Name : Resident  
Registration  
Number :

690723-\*\*\*\*\*

Address : 

- Attendance Days 03/03/2020 ~ 05/19/2020
- Total Number of Hours 71 Hours
- Description of Activities Medical support volunteering related to COVID-19

This is to certify that (Jong-hoon Lee) has participated in volunteer activities as above.

June 24, 2020

Gangbuk-Gu Volunteer Center

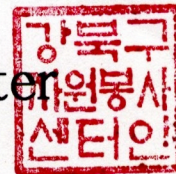

Director : Hee-jung You (Phone : 82-02-901-6647)

◆ This is to certify the participation of the concerned person in volunteering as above.  
Any falsification or alteration of this certificate can be checked by entering the issue number in the certificate validation menu of the "1365 volunteer portal([www.1365.go.kr](http://www.1365.go.kr))."  
Validation of this issue number will be available within 90 days upon issuance.

\* Description of volunteering issued from related agencies have been consolidated in link with the information from the portal.

Issue Number: 20206241314495\_30314819

For Submission

■ Description of volunteer activities

| Dates      | Hours | Fields of activity     | Description                                      | Volunteer Agency            |
|------------|-------|------------------------|--------------------------------------------------|-----------------------------|
| 05/19/2020 | 6     | Disaster and Emergency | Medical support volunteering related to COVID-19 | Gangbuk-Gu Volunteer Center |
|            |       |                        |                                                  | Seoul Volunteer Center      |
| 05/18/2020 | 6     | Disaster and Emergency | Medical support volunteering related to COVID-19 | Gangbuk-Gu Volunteer Center |
|            |       |                        |                                                  | Seoul Volunteer Center      |
| 05/17/2020 | 5     | Disaster and Emergency | Medical support volunteering related to COVID-19 | Gangbuk-Gu Volunteer Center |
|            |       |                        |                                                  | Seoul Volunteer Center      |
| 05/16/2020 | 5     | Disaster and Emergency | Medical support volunteering related to COVID-19 | Gangbuk-Gu Volunteer Center |
|            |       |                        |                                                  | Seoul Volunteer Center      |
| 05/15/2020 | 6     | Disaster and Emergency | Medical support volunteering related to COVID-19 | Gangbuk-Gu Volunteer Center |
|            |       |                        |                                                  | Seoul Volunteer Center      |
| 05/14/2020 | 6     | Disaster and Emergency | Medical support volunteering related to COVID-19 | Gangbuk-Gu Volunteer Center |
|            |       |                        |                                                  | Seoul Volunteer Center      |
| 05/13/2020 | 6     | Disaster and Emergency | Medical support volunteering related to COVID-19 | Gangbuk-Gu Volunteer Center |
|            |       |                        |                                                  | seoul Volunteer Center      |
| 05/12/2020 | 6     | Disaster and Emergency | Medical support volunteering related to COVID-19 | Gangbuk-Gu Volunteer Center |
|            |       |                        |                                                  | Seoul Volunteer Center      |
| 03/14/2020 | 5     | Disaster and Emergency | Medical support volunteering related to COVID-19 | Gangbuk-Gu Volunteer Center |
|            |       |                        |                                                  | Seoul Volunteer Center      |
| 03/08/2020 | 6     | Disaster and Emergency | Medical support volunteering related to COVID-19 | Gangbuk-Gu Volunteer Center |
|            |       |                        |                                                  | Seoul Volunteer Center      |

Director : Hee-jung You (Phone : 82-02-901-6647)

◆ This is to certify the participation of the concerned person in volunteering as above.  
Any falsification or alteration of this certificate can be checked by entering the issue number in the certificate validation menu of the "1365 volunteer portal([www.1365.go.kr](http://www.1365.go.kr))."  
Validation of this issue number will be available within 90 days upon issuance.

\* Description of volunteering issued from related agencies have been consolidated in link with the information from the portal.

Issue Number: 20206241314495\_30314819

For Submission

## ■ Description of volunteer activities

|            |   |                        |                                                     |                                |
|------------|---|------------------------|-----------------------------------------------------|--------------------------------|
| 03/07/2020 | 5 | Disaster and Emergency | Medical support volunteering<br>related to COVID-19 | Gangbuk-Gu Volunteer<br>Center |
|            |   |                        |                                                     | seoul Volunteer Center         |
| 03/04/2020 | 5 | Disaster and Emergency | Medical support volunteering<br>related to COVID-19 | Gangbuk-Gu Volunteer<br>Center |
|            |   |                        |                                                     | Seoul Volunteer Center         |
| 03/03/2020 | 5 | Disaster and Emergency | Medical support volunteering<br>related to COVID-19 | Gangbuk-Gu Volunteer<br>Center |
|            |   |                        |                                                     | Seoul Volunteer Center         |

Director : Hee-jung You (Phone : 82-02-901-6647)

◆ This is to certify the participation of the concerned person in volunteering as above.  
Any falsification or alteration of this certificate can be checked by entering the issue  
number in the certificate validation menu of the "1365 volunteer portal([www.1365.go.kr](http://www.1365.go.kr))."  
Validation of this issue number will be available within 90 days upon issuance.

\* Description of volunteering issued from related agencies have been consolidated in link with  
the information from the portal.
